# Supplementary material
Source: ML conference proceedings conference paper supplement (https://proceedings.neurips.cc/paper_files/paper/2009/hash/8e296a067a37563370ded05f5a3bf3ec-Abstract.html)
Supplement: Supplementary file 1 [file 8e296a067a37563370ded05f5a3bf3ec-Supplemental.zip]

Archive with 1 entries (1 files):
- extra/NIPS2009_0025_extra.pdf
